# Supplementary material for: Fluorescent In based MOFs showing “turn on” luminescence towards thiols and acting as a ratiometric fluorescence thermometer
Source: Royal Society of Chemistry journal article supplement (doi:10.1039/c9tc00463g), 2019-01-01
Supplement: c9tc00463g1.pdf [file c9tc00463g1.pdf]

## Electronic Supplementary Information

### Fluorescent In-based MOFs showing “turn on” luminescence to thiols and acting as a ratiometric fluorescence thermomete

Zhao-Feng Wu,<sup>†,‡</sup> Bin Tan,<sup>†</sup> Ever Velasco,<sup>‡</sup> Hao Wang,<sup>‡</sup> Nan-Nan Shen,<sup>†</sup> Yu-Jie Gao,<sup>†</sup> Xu Zhang,<sup>†</sup> Kun Zhu,<sup>‡</sup> Guo-Yu Zhang,<sup>‡</sup> Yan-Yao Liu,<sup>‡</sup> Xiu-Ze Hei,<sup>‡</sup> Xiao-Ying Huang,<sup>†,\*</sup> and Jing Li<sup>‡</sup>

<sup>†</sup> State Key Laboratory of Structural Chemistry, Fujian Institute of Research on the Structure of Matter, Chinese Academy of Sciences, Fuzhou, Fujian 350002, P.R. China

<sup>‡</sup> Department of Chemistry and Chemical Biology, Rutgers University, 610 Taylor Road, Piscataway, New Jersey 08854, United States

\*E-mail: [xyhuang@fjirsm.ac.cn](mailto:xyhuang@fjirsm.ac.cn)

**Table S1** Crystallographic data and structural refinement details for compound **2**.

|                                                                                        |                                                                                                        |
|----------------------------------------------------------------------------------------|--------------------------------------------------------------------------------------------------------|
| Empirical formula                                                                      | C <sub>91.5</sub> H <sub>83.5</sub> Cl <sub>2</sub> In <sub>3</sub> N <sub>5.5</sub> O <sub>27.5</sub> |
| Formula weight                                                                         | 2115.49                                                                                                |
| Crystal system                                                                         | orthorhombic                                                                                           |
| Space group                                                                            | <i>P</i> 222 <sub>1</sub>                                                                              |
| <i>a</i> /Å                                                                            | 9.3390(2)                                                                                              |
| <i>b</i> /Å                                                                            | 15.6217(5)                                                                                             |
| <i>c</i> /Å                                                                            | 33.6709(19)                                                                                            |
| <i>V</i> /Å <sup>3</sup>                                                               | 4912.3(3)                                                                                              |
| <i>Z</i>                                                                               | 2                                                                                                      |
| $\lambda$                                                                              | 0.71073                                                                                                |
| <i>T</i> /K                                                                            | 295(2)                                                                                                 |
| $\rho_{\text{calcd}}$ /g cm <sup>-3</sup>                                              | 1.430                                                                                                  |
| $\mu$ /mm <sup>-1</sup>                                                                | 0.829                                                                                                  |
| <i>F</i> (000)                                                                         | 2144                                                                                                   |
| Independent refls.                                                                     | 9353                                                                                                   |
| No. of parameters                                                                      | 431                                                                                                    |
| <sup>a</sup> <i>R</i> <sub>1</sub> ( <i>I</i> > 2 $\sigma$ ( <i>I</i> ))               | 0.0632                                                                                                 |
| <sup>b</sup> <i>wR</i> ( <i>F</i> <sub>2</sub> ) ( <i>I</i> > 2 $\sigma$ ( <i>I</i> )) | 0.1565                                                                                                 |
| Flack parameter                                                                        | 0.13(5)                                                                                                |

$${}^a R_1 = \frac{\sum \|F_o\| - |F_c|}{\sum \|F_o\|}, \quad {}^b wR_2 = \left[ \frac{\sum w(F_o^2 - F_c^2)^2}{\sum w(F_o^2)^2} \right]^{1/2}$$

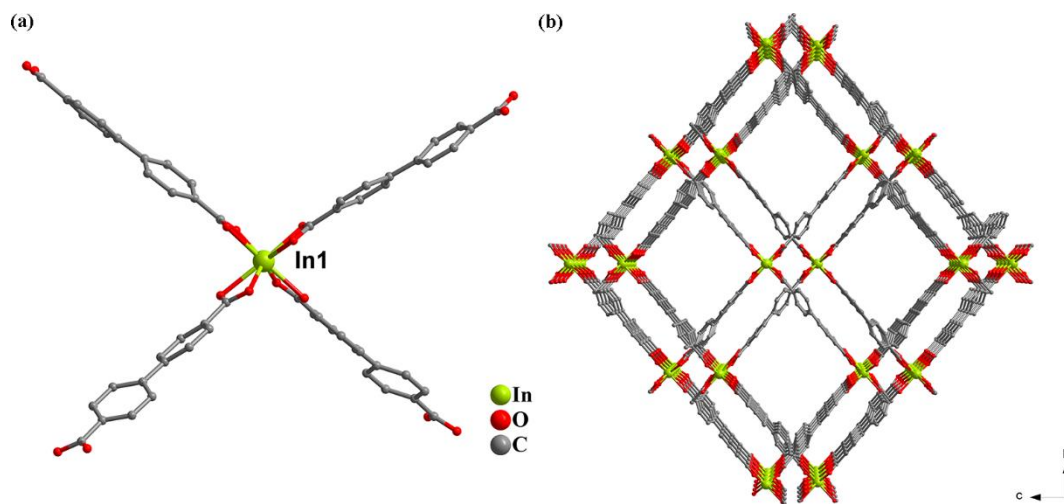**Fig. S1** Coordination environments of In<sup>3+</sup> ion in compound **1** and the 3D framework according to the literature.<sup>1</sup>

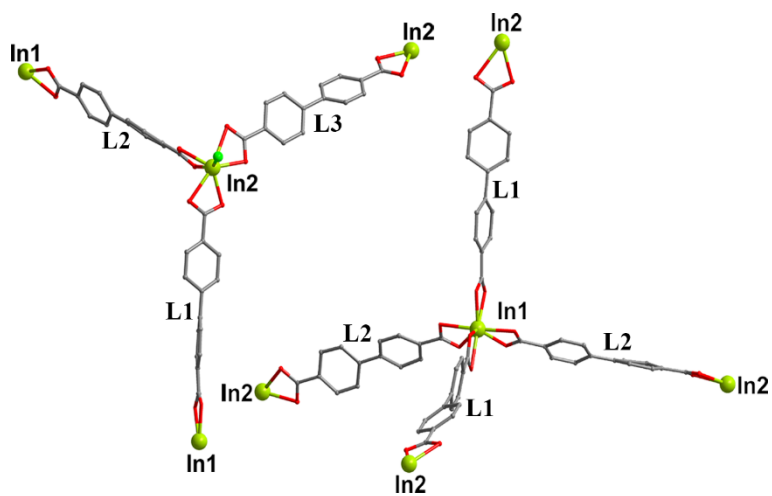

**Fig. S2 (b)** Coordination environments of the unique In<sup>3+</sup> ions in compound **2**.

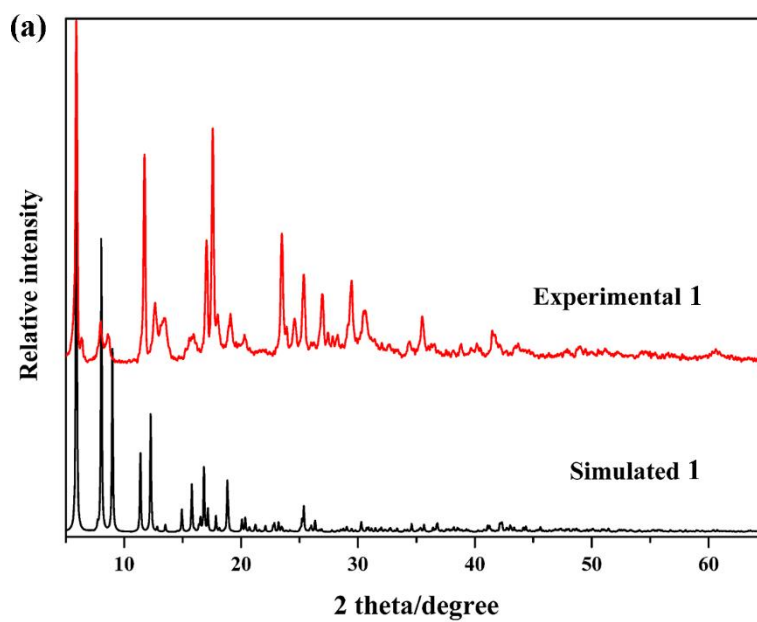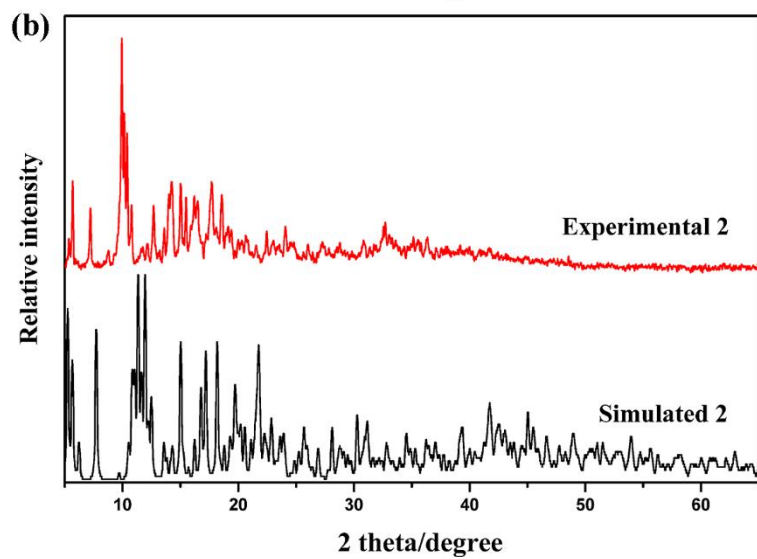

**Fig. S3** PXRD patterns of the title compounds and the simulated ones from single-crystal X-ray structures.

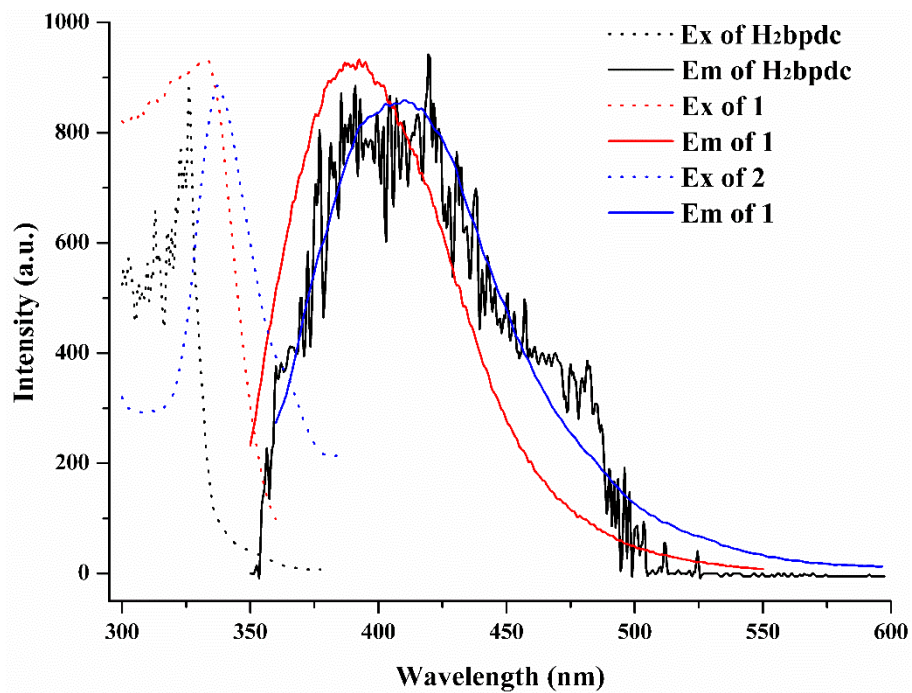

**Fig. S4** Solid state FL spectra for bpdc ligand and compounds **1** and **2**.

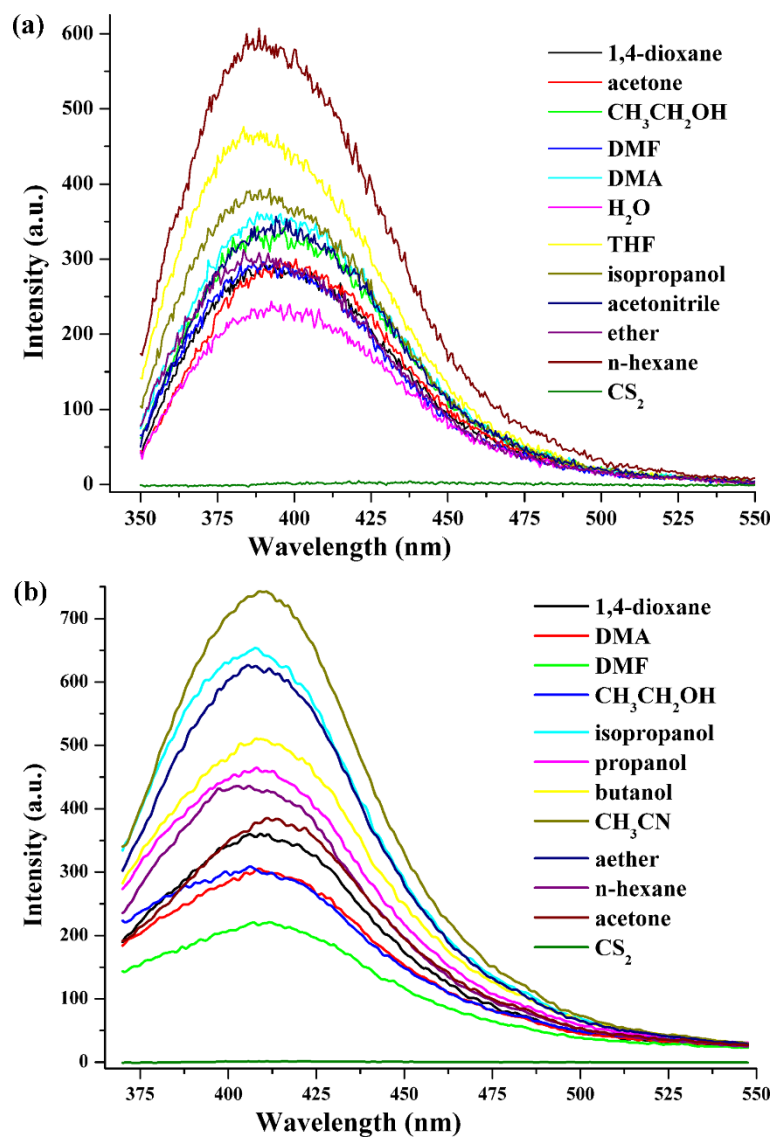

Fig. S5 Emission spectra of 1 (a) and 2 (b) dispersed in different solvents.

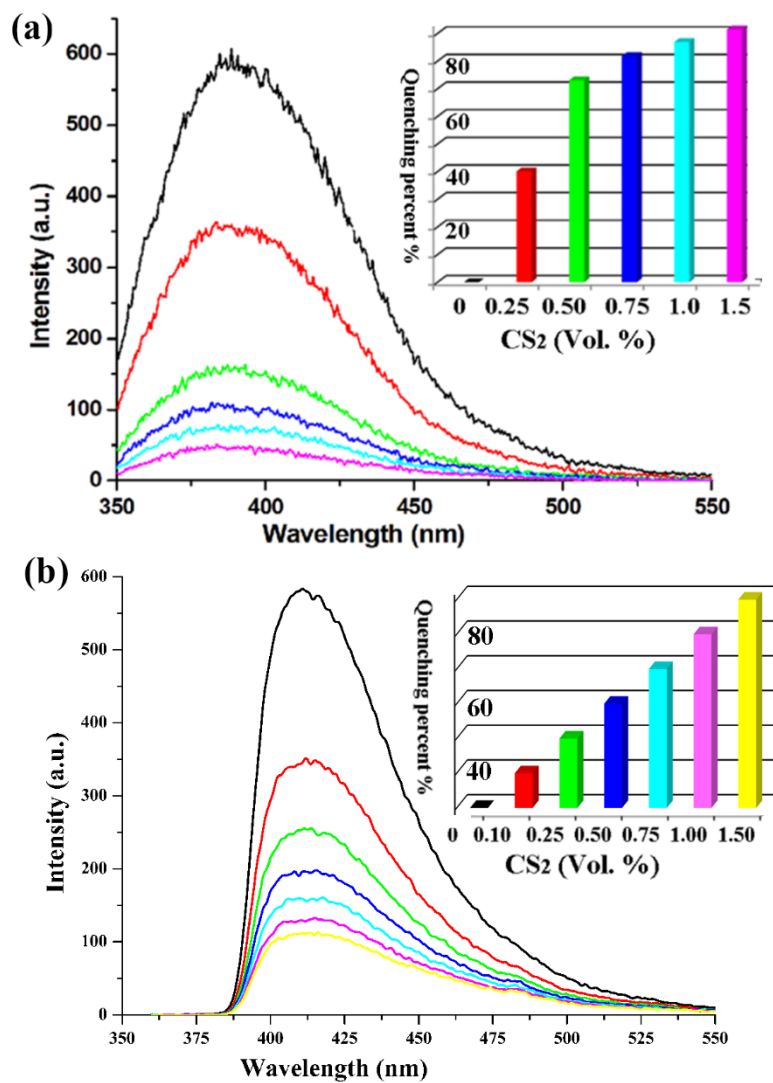

**Fig. S6** Emission spectra of **1** (a) and **2** (b) upon addition of various amounts of CS<sub>2</sub>.

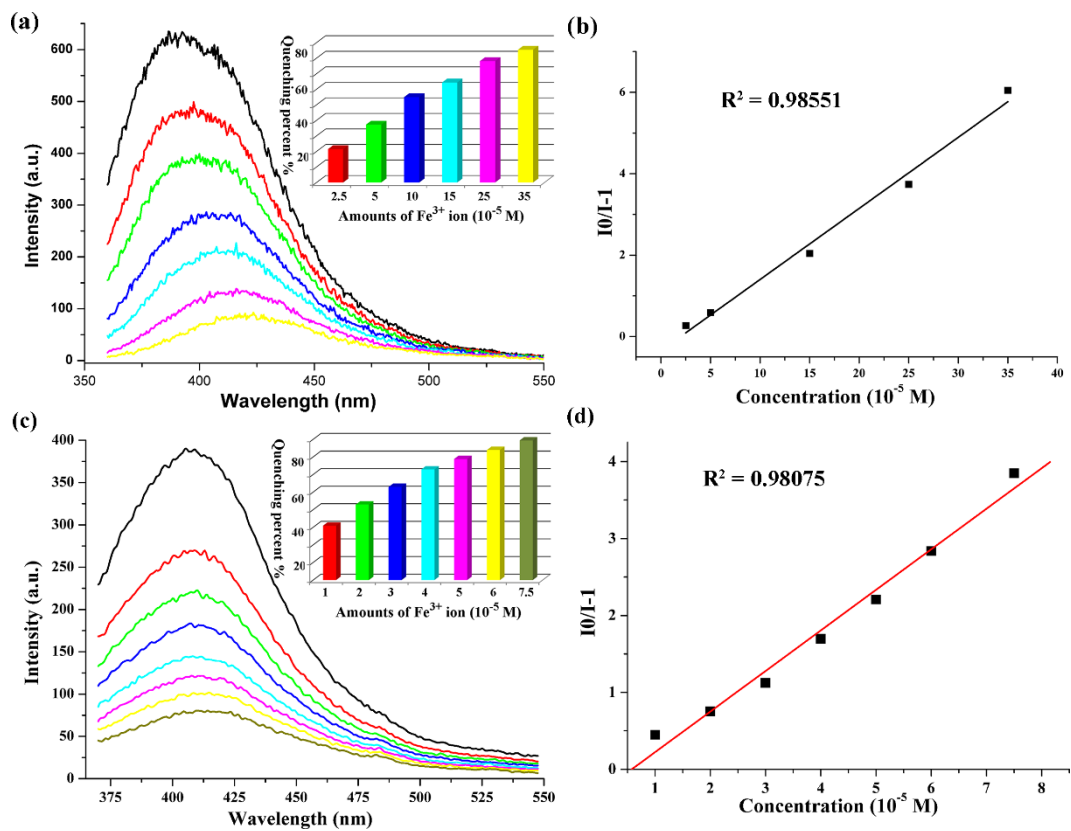

**Fig. S7** Emission spectra of **1** (a) and **2** (c) with various contents of Fe<sup>3+</sup>, and the corresponding SV plots of **1** (b) and **2** (d).

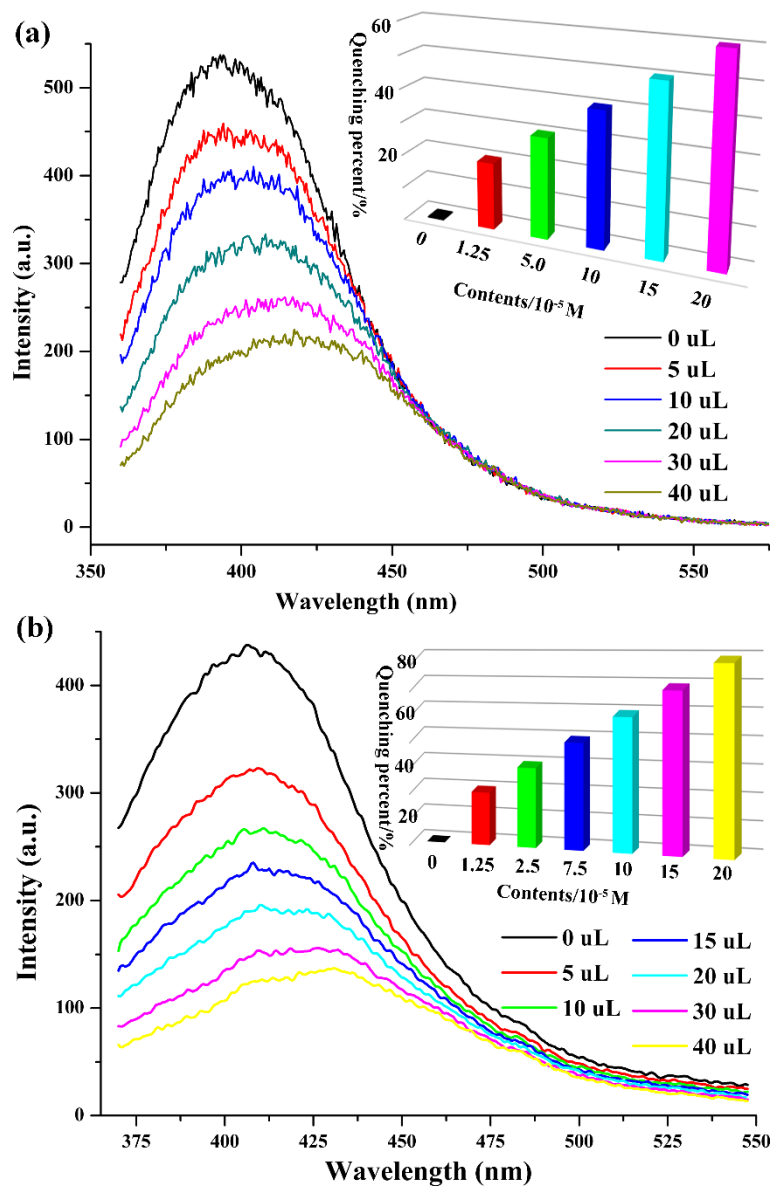

Fig. S8 (a) Fluorescence spectra of 1 (a) and 2 (b) with various contents of TNP.



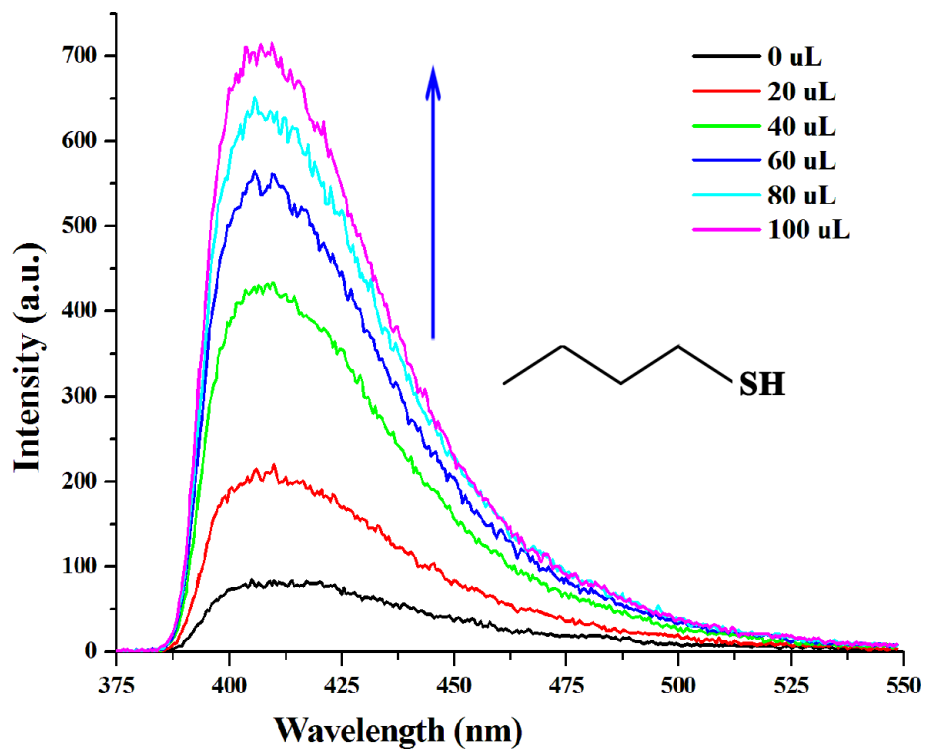

Fig. S9 Emission spectra of **2** with various contents of  $10^{-2}$  M 1-butane-1-thiol.

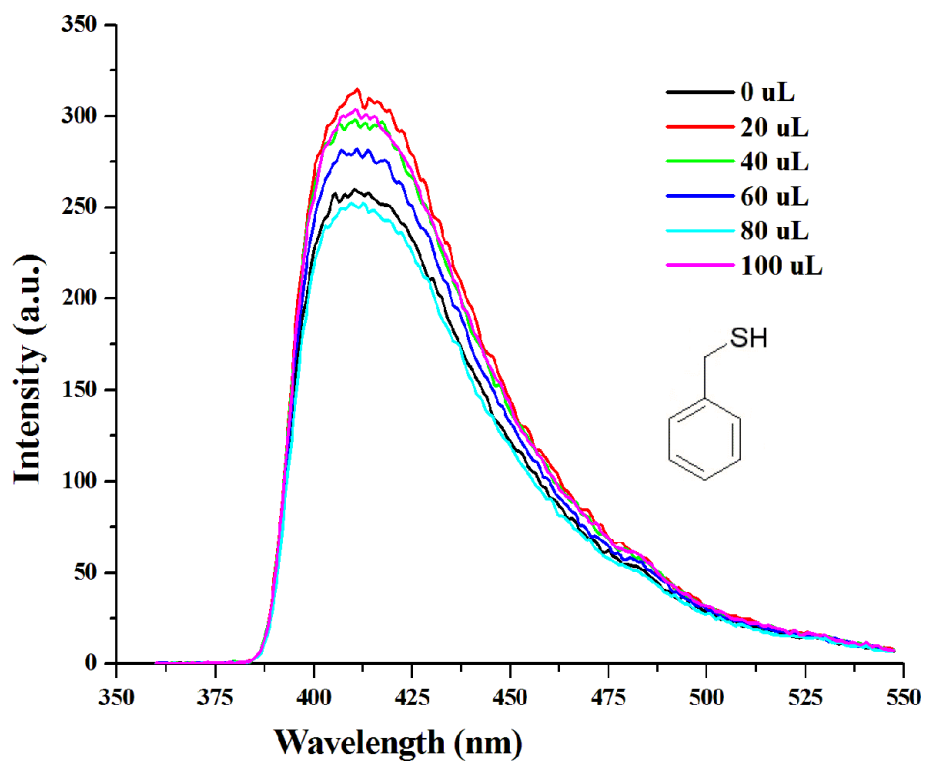

Fig. S10 Emission spectra of **2** with various contents of benzyl mercaptane.

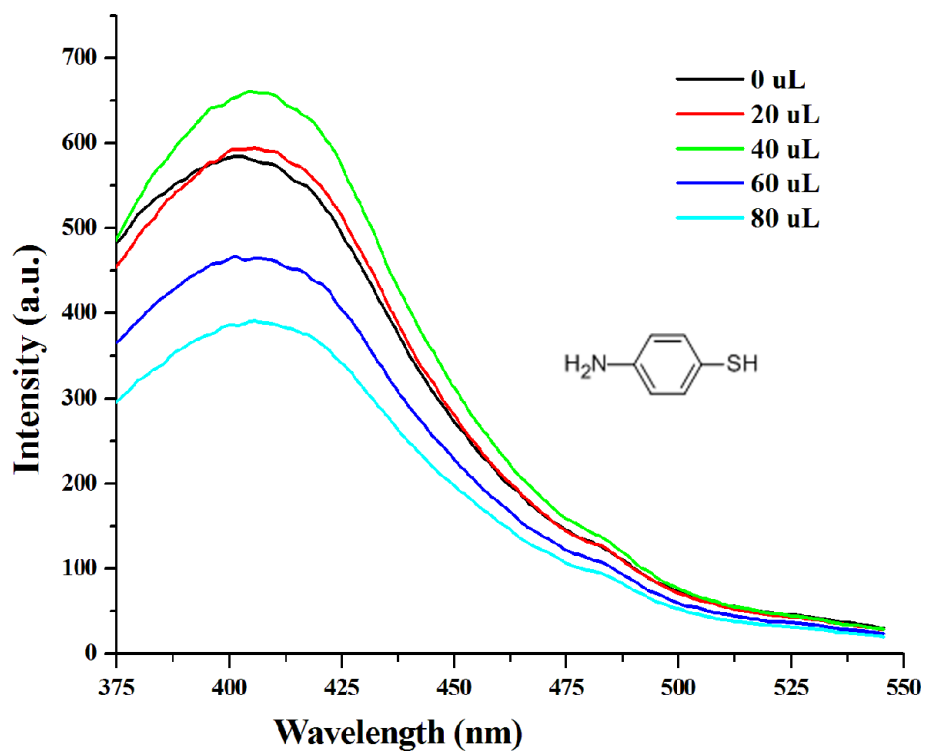

Fig. S11 Emission spectra of 2 with various contents of 4-aminophenol.

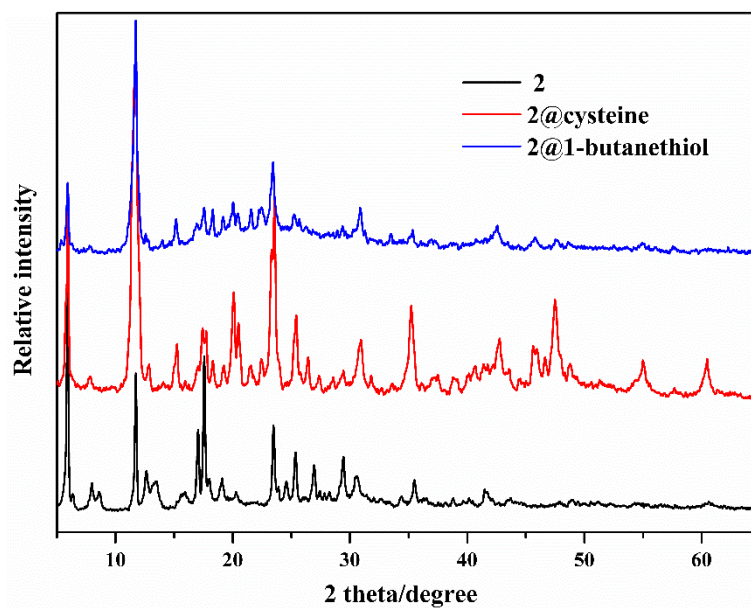

Fig. S12 PXRD patterns of 2 and the samples immersed in  $10^{-2}$  M ethanol solution of thiols for 24h.

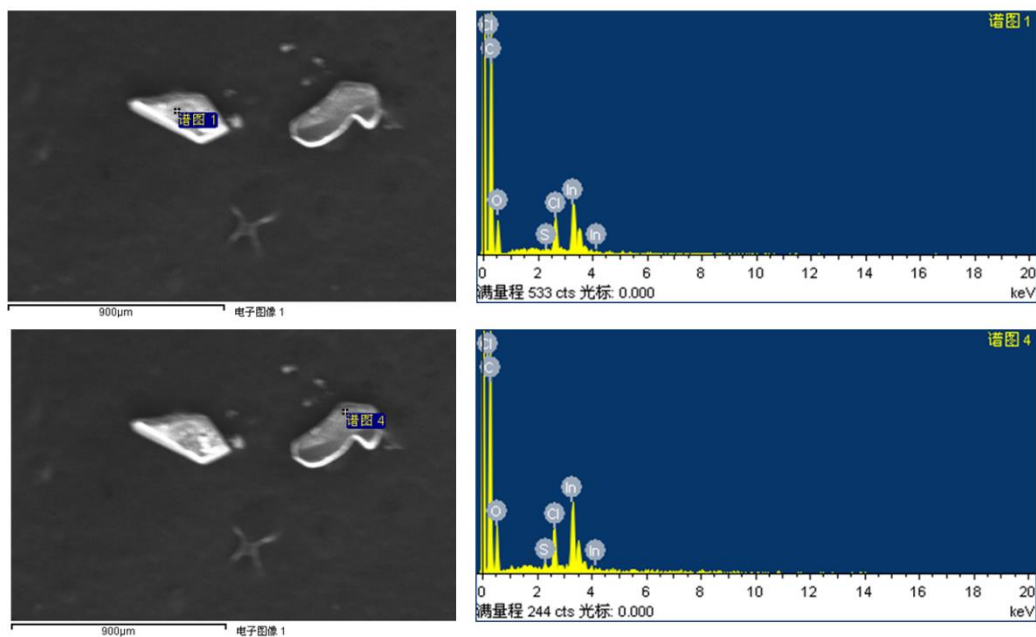

**Fig. S13** EDS spectra of solid state sample of **2** treated with cysteine (up) and 1-butanethiol (down) respectively.

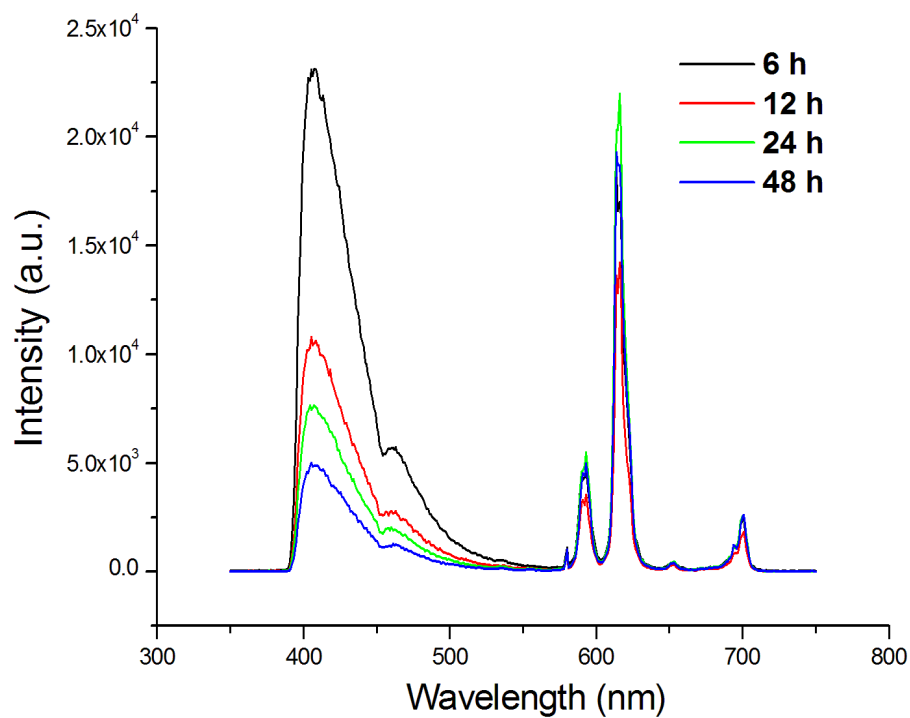

**Fig. S14** Emission spectra of **2** treated with  $10^{-2}$  M ethanol solution of  $\text{Eu}^{3+}$  at different times.

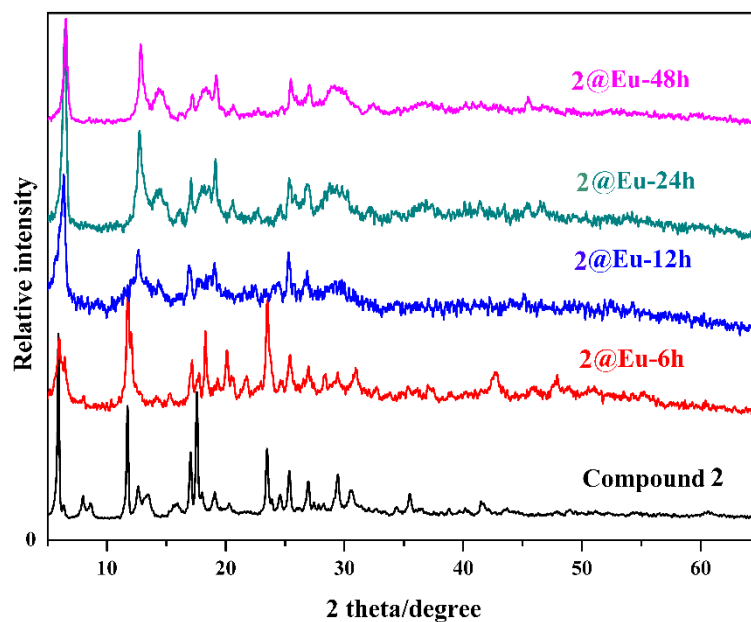

Fig. S15 PXR D patterns of **2** treated with  $10^{-2}$  M ethanol solution of  $\text{Eu}^{3+}$  at different times.

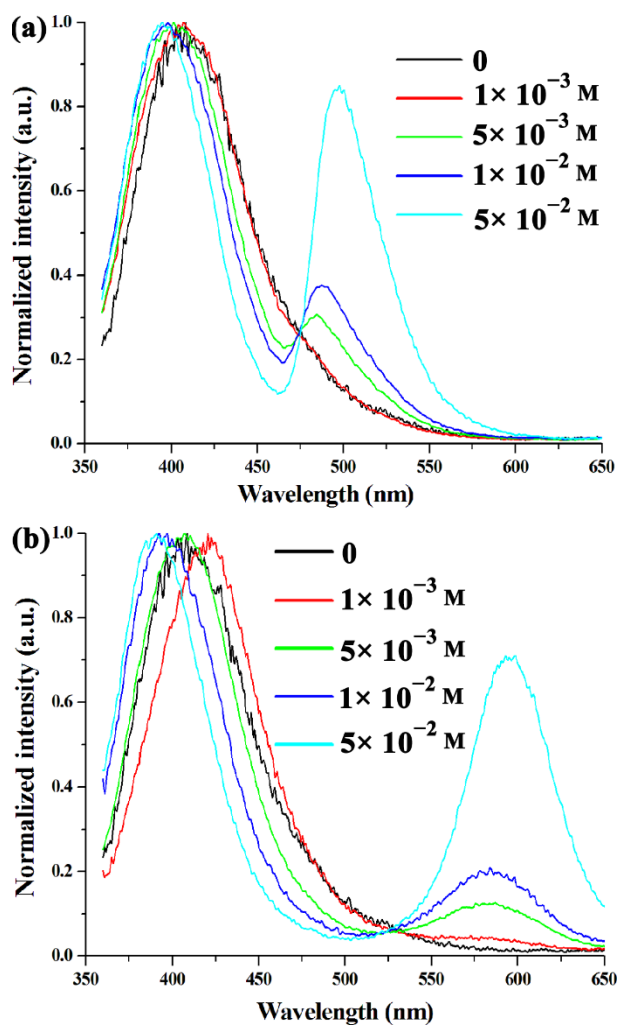

Fig. S16 Emission spectra of **2** treated with ethanol solution of different contents of AF (a) and DSM (b) for 12 h.

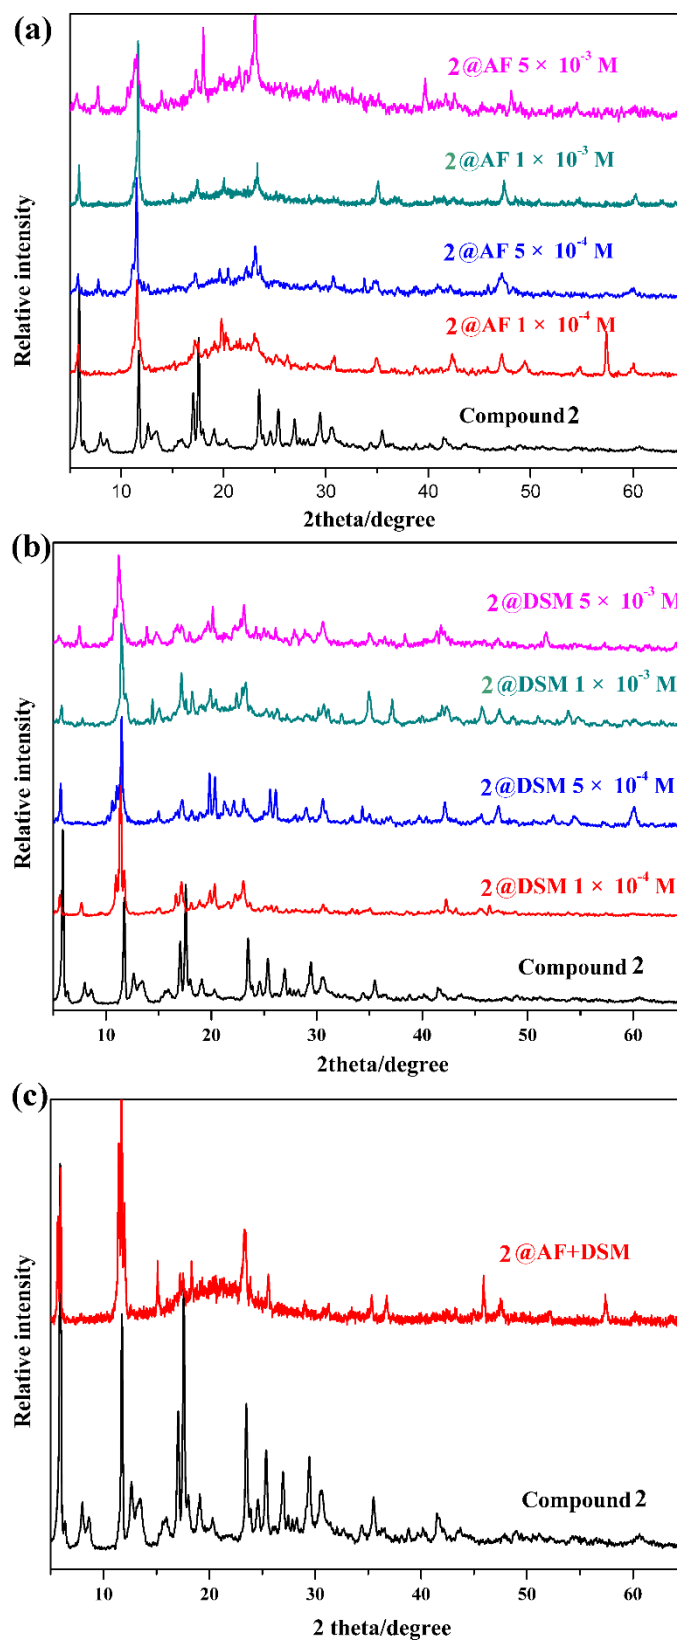

**Fig. S17** PXR D patterns of **2** treated with  $10^{-2}$  M ethanol solution of AF (a), DSM (b) with different concentrations and **2** treated with  $10^{-2}$  M ethanol solution of both AF and DSM (c), respectively.

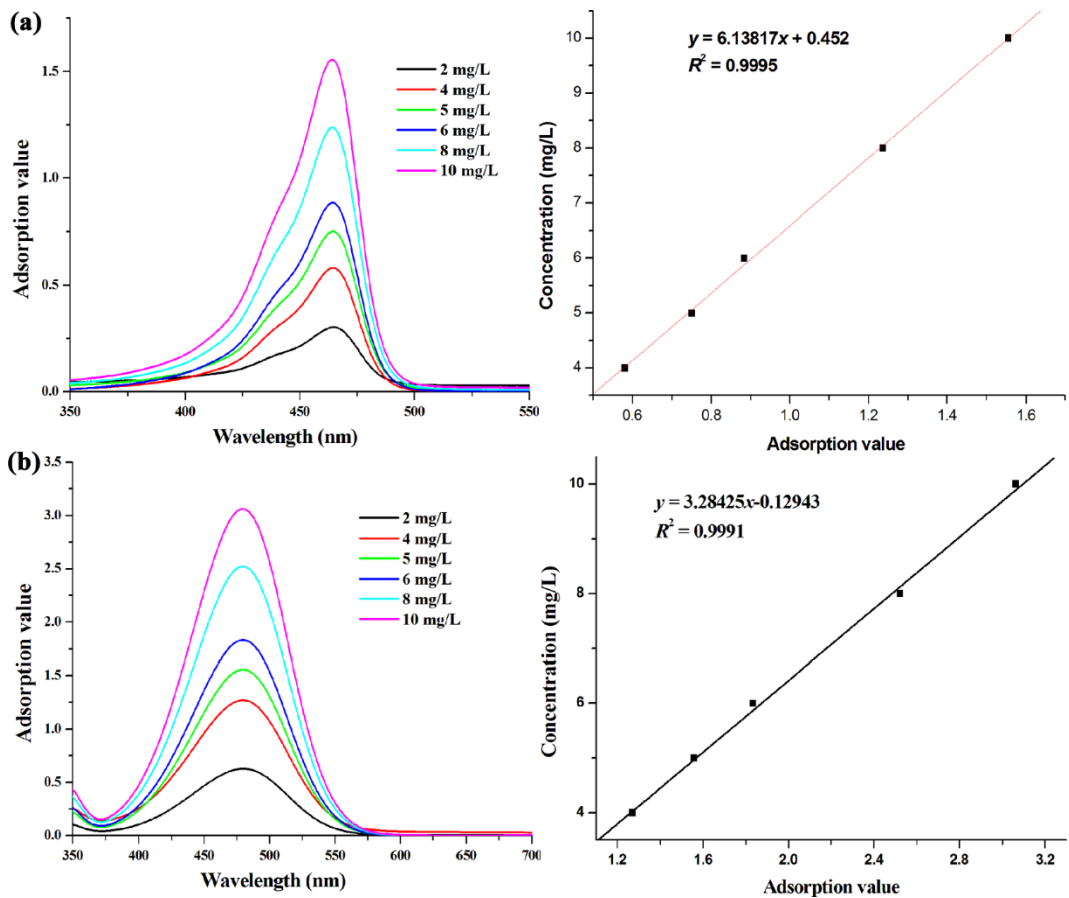

Fig. S18 Adsorption spectra of ethanol solution of dyes for the determination of AF (a) and DSM (b) contents in 2.
